# Supplementary material for: NFIC regulates ribosomal biology and ER stress in pancreatic acinar cells and restrains PDAC initiation
Source: PubMed Central journal article supplement (PMC10290102; doi:10.1038/s41467-023-39291-x), 2023-06-23

I. Cobo et al. NFIC regulates ribosomal biology and ER stress in pancreatic acinar cells and restrains PDAC initiation

SUPPL. MATERIAL

SUPPL. FIGURE

A

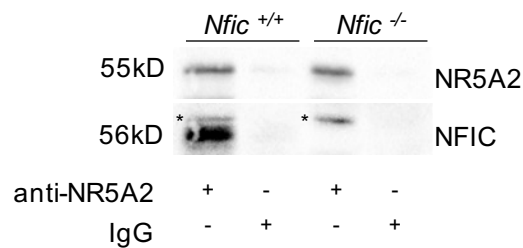

B

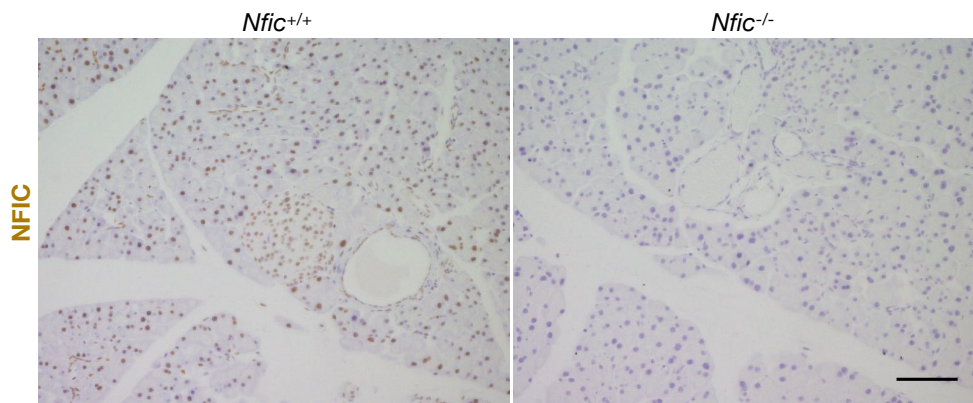

**Supplementary Figure 1. NFIC validation experiments.** (A) Validation of the specificity of the interaction of NR5A2 and NFIC in the pancreas of adult mice. Immunoprecipitation-western blotting analysis showing that the two proteins are part of the same complex in *Nfic* WT mice. In contrast, NR5A2 immunoprecipitates of *Nfic*<sup>-/-</sup> pancreata do not contain proteins recognized by anti-NFIC antibodies (representative image of 2 independent experiments). \* indicates a non-specific band. (B) Immunohistochemical validation of the antibody recognizing NFIC used in the study. NFIC is detected in epithelial cells in the pancreas of wild-type (WT) mice but not in *Nfic*<sup>-/-</sup> mice (representative image of 3 independent experiments).

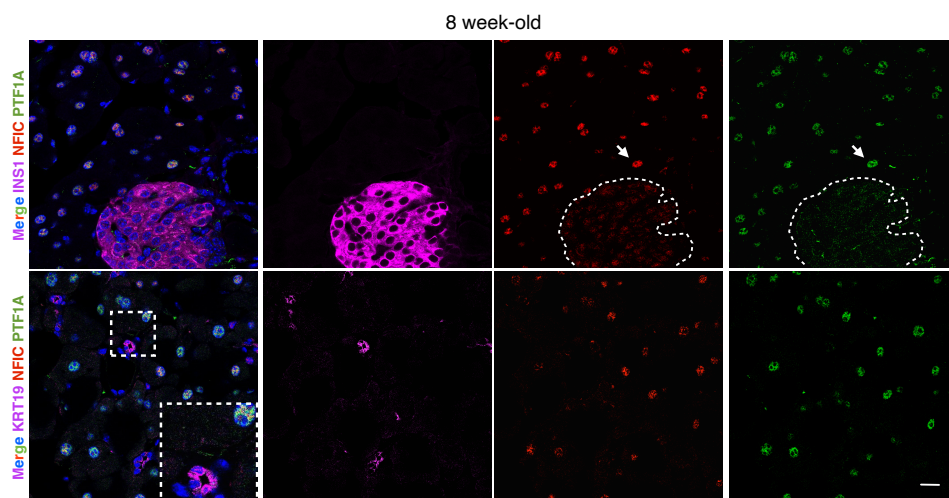

**Supplementary Figure 2. In the adult mouse pancreas, NFIC is expressed at highest levels in acinar cells and at lower levels in ductal and endocrine cells.** Expression analysis of NFIC in the pancreas of 8 week-old wild-type mice using triple IF on 4% PFA-fixed sections. NFIC is expressed at higher levels in acinar cells than in endocrine cells (INS1<sup>+</sup>) and it is undetectable in ductal cells (KRT19<sup>+</sup>). Square with dotted lines denotes the magnified area. Arrow denotes acinar cell. One representative image of 4 wild-type pancreata is shown

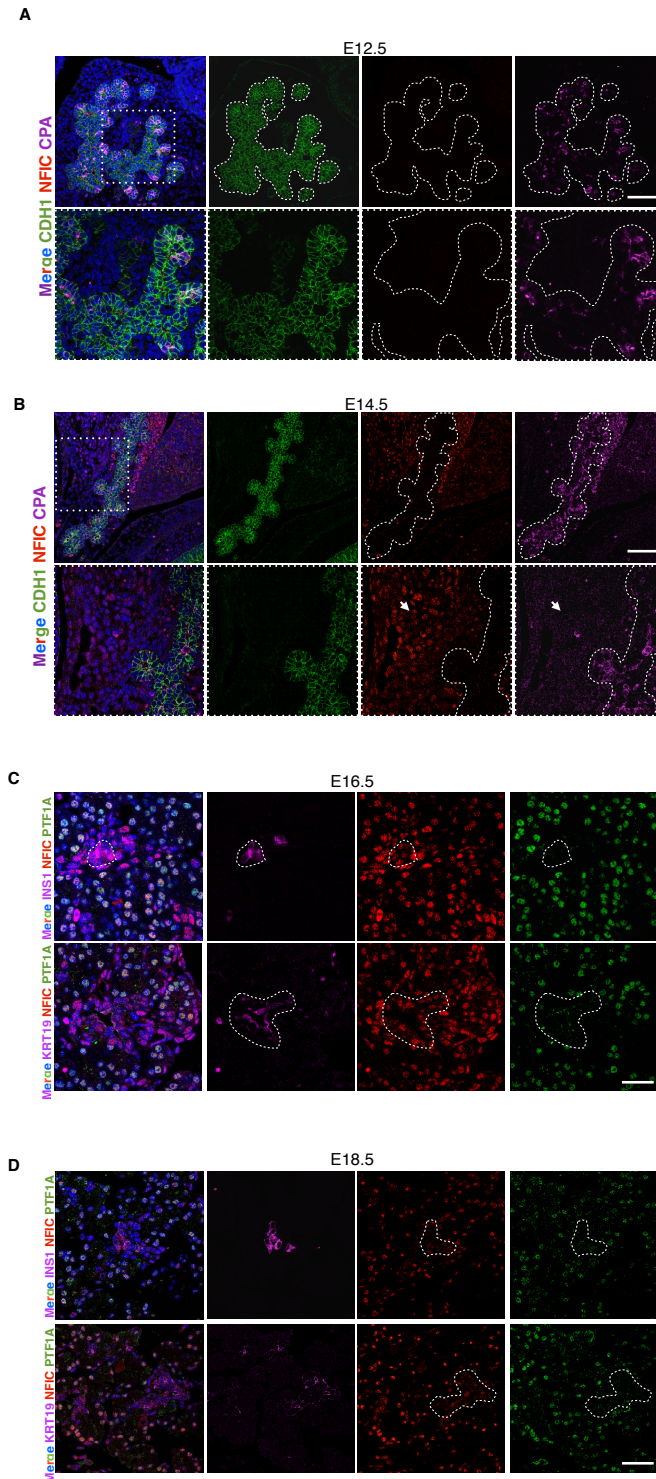

**Supplementary Figure 3. NFIC is expressed at late stages of pancreatic development.** (A,B) Expression analysis of NFIC in the pancreas of E12.5 (A) and E14.5 (B) wild-type embryos using triple IF on 4% PFA-fixed sections shows undetectable levels of NFIC. Expression of CDH1 and CPA was used to trace pancreatic progenitors. Broken lines delineate epithelial cells of the embryonic pancreas; arrows point to cells outside the embryonic pancreas showing the expression of NFIC in non-pancreatic cells in E14.5 embryos. (C,D) Expression of NFIC in the pancreas of E16.5 (C) and E18.5 (D) wild-type embryos using triple IF with antibodies detecting PTF1A, INS1, and KRT19. The expression of NFIC in acinar (PTF1A<sup>+</sup>), endocrine (INS1<sup>+</sup>) and ductal cells (KRT19<sup>+</sup>) is shown. One representative image of 3 wild-type pancreata is shown. Square with broken lines denotes the region magnified.

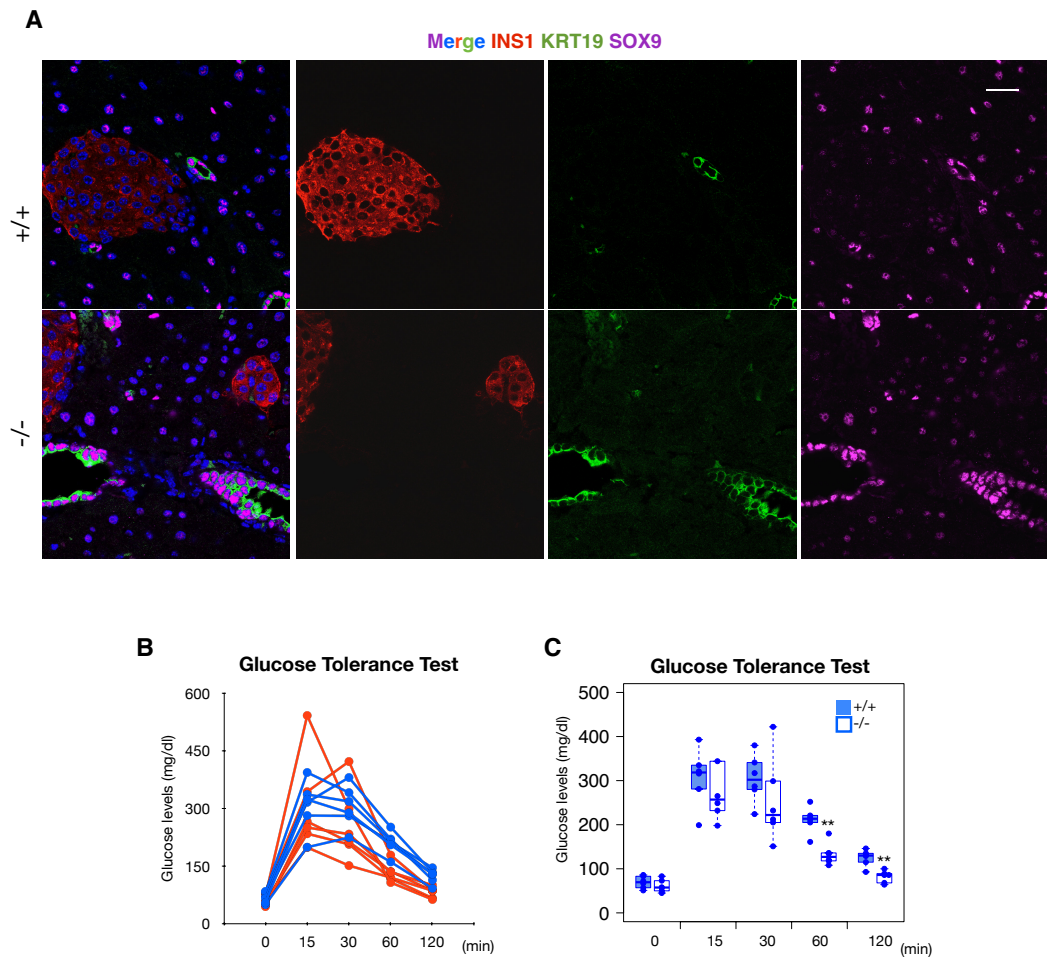

**Supplementary Figure 4. *Nfic*<sup>-/-</sup> mice display no major abnormalities in ductal or endocrine cells and have a normal response to glucose overload.** (A) IF analysis of INS1, KRT19 and SOX9 expression in wild-type and *Nfic*<sup>-/-</sup> pancreata (8-10 weeks). A representative image of 3 independent experiments is shown. (B,C) Glucose tolerance test in wild-type and *Nfic*<sup>-/-</sup> mice (11-17 weeks) showing similar glucose levels in mice of both genotypes at 0, 15 and 30 minutes but reduced glucose levels in *Nfic*<sup>-/-</sup> mice at 60 and 120 min (n=6 male mice/genotype). Fasting glucose levels were measured before and after intra-peritoneal injection of glucose (2g/kg of body mass). Data for each individual mice (B) and grouped by genotype (C) are shown. In (C), two-sided Mann-Whitney U test was used to calculate statistical significance. P<0.01(\*\*). At 0 min, P=0.37; at 15 min, P=0.58; at 30 min, P=0.24; at 60 min, P=0.004; at 120 min, P= 0.008. Boxplots are displayed showing the minimum, the maximum, the sample median, and the first and third quartiles. Source data are provided as a source data file.

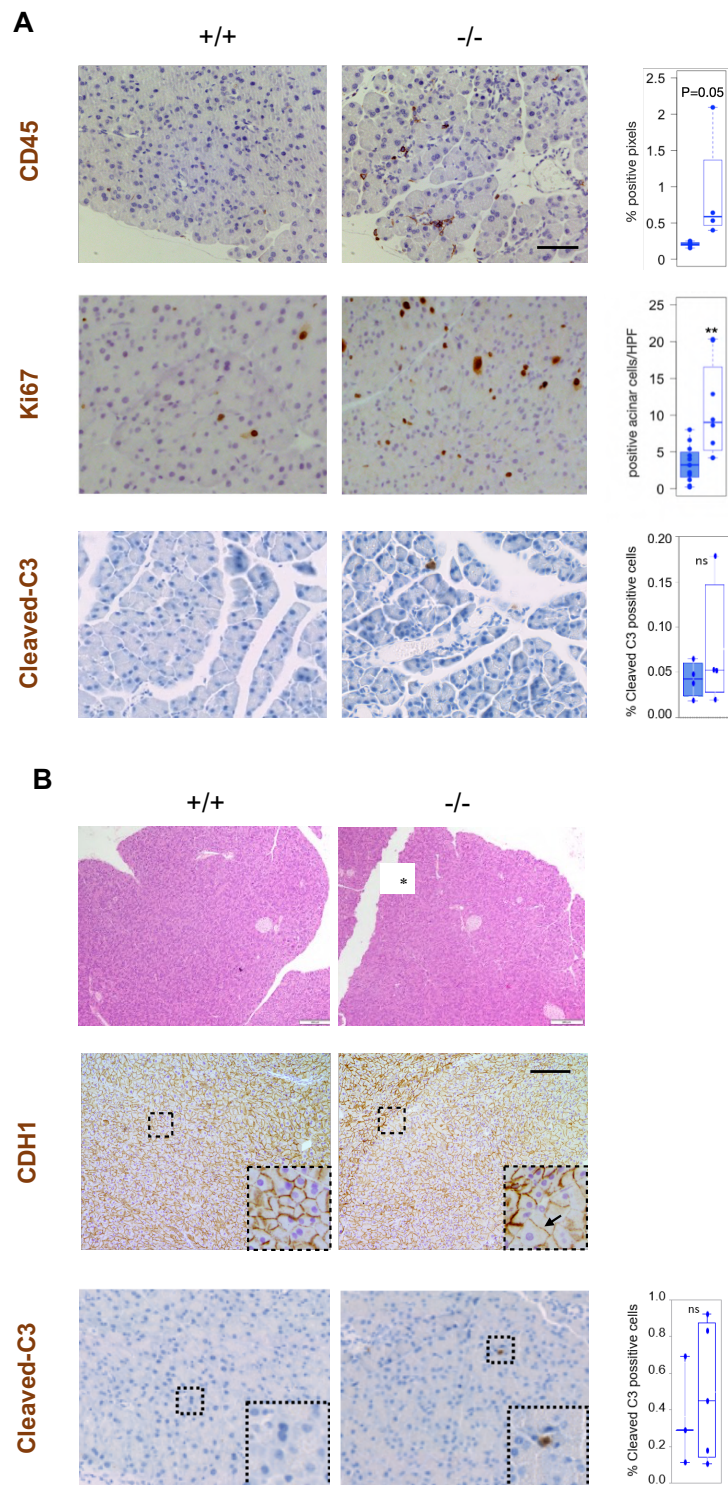

**Supplementary Figure 5. Histological and immunohistochemical analysis of the pancreas of young adult (8-10 week-old) (A) and older (20-25 week-old) (B) WT and *Nfic*<sup>-/-</sup> mice.** (A) IHC and quantitative analysis of leukocyte infiltration ( $n \geq 3$  mice/genotype), acinar cell proliferation (Ki67) ( $n \geq 8$  mice/genotype), and apoptosis (cleaved caspase 3, cC3) ( $n = 4$  mice/genotype) in the pancreas of wild-type and *Nfic*<sup>-/-</sup> mice (CD45,  $P = 0.05$ ; Ki67  $P = 0.004$ ; cC3,  $P = 0.69$ ). (B) H-E staining of old WT and *Nfic*<sup>-/-</sup> pancreata and IHC analysis of CDH1 expression and cC3 ( $n \geq 3$  mice/genotype). For IHC analysis, random images ( $n = 10$ ) were taken from each pancreas and only unequivocally positive acinar cells were considered. Two-sided Mann-Whitney U test was used to calculate statistical significance. Boxplots show the minimum, the maximum, the sample median, and the first and third quartiles. Source data are provided as a source data file.

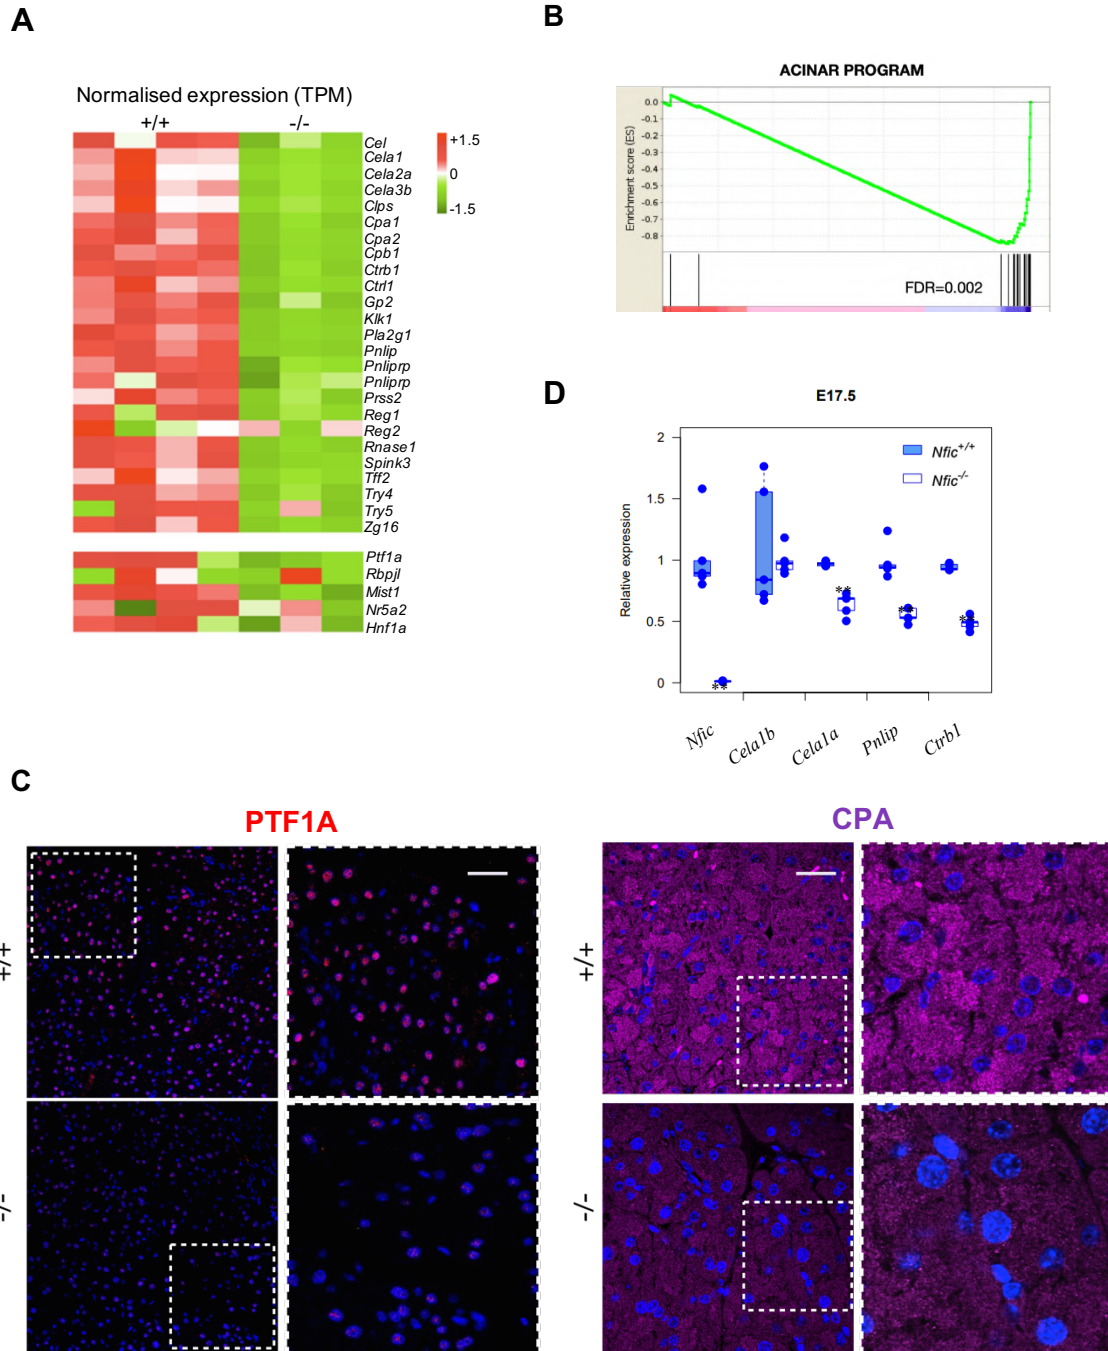

**Supplementary Figure 6. NFIC is required for normal acinar cell differentiation.** (A) Heatmap showing the expression of transcripts coding for digestive enzymes, secretory granule components, and acinar transcription factors in WT and *Nfic*<sup>-/-</sup> pancreata (RNA-Seq data). (B) GSEA enrichment plot showing the down-regulation of the acinar signature defined by Masui *et al.* in *Nfic*<sup>-/-</sup> pancreata. (C) IF analysis of PTF1A and CPA expression in WT and *Nfic*<sup>-/-</sup> pancreata showing regions of the exocrine parenchyma with reduced expression of both proteins. One representative image is shown (n=3 mice/genotype). (D) RT-qPCR analysis of expression of digestive enzyme transcripts in the pancreas of E17.5 WT and *Nfic*<sup>-/-</sup> pancreata (n=5 mice/genotype; *Nfic*, P=0.007; *Ccl2a*, P=0.008; *Pnlip*, P=0.007; *Ctrb1*, P=0.008; two-sided Mann-Whitney U test). Boxplots are displayed showing the minimum, the maximum, the sample median, and the first and third quartiles. Source data are provided as a source data file.

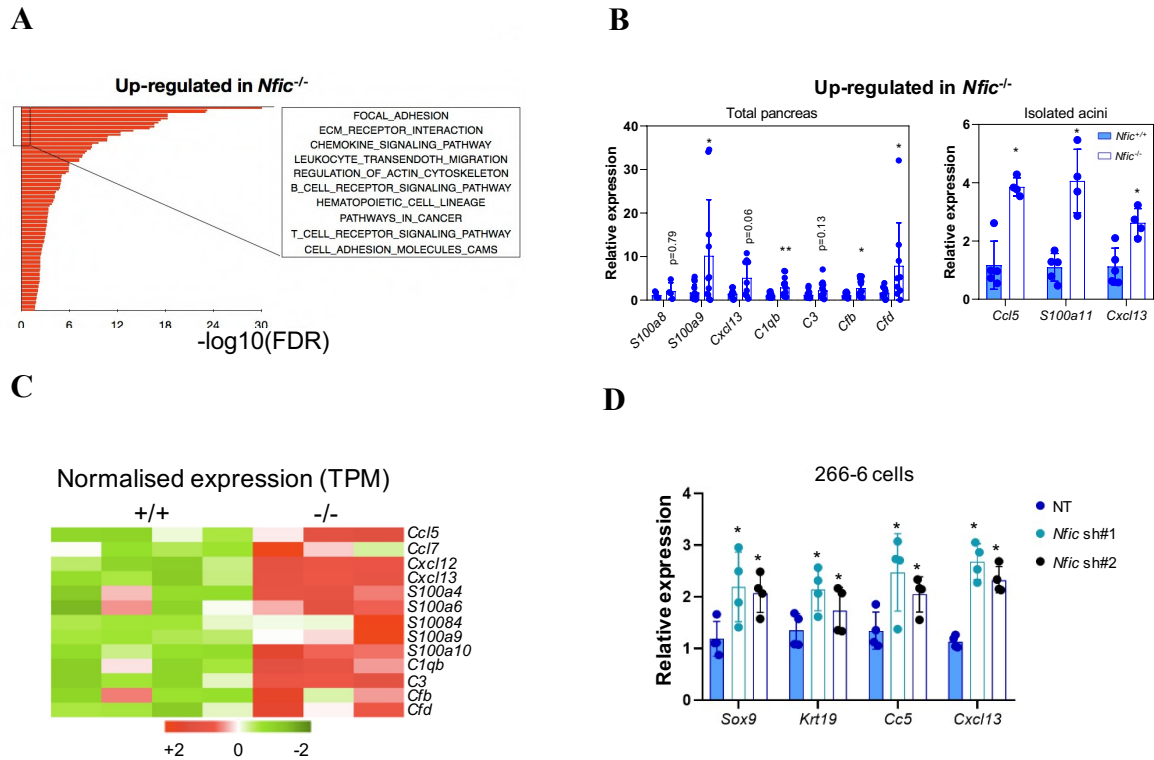

**Supplementary Figure 7. NFIC restrains inflammatory gene expression in the mouse pancreas and in 266-6 cells.** (A) Gene set enrichment analysis of the pre-ranked list of differentially expressed transcripts in the pancreas of *Nfic*<sup>-/-</sup> mice compared to wild-type. The pre-ranked list was computed with REACTOME and significant gene sets were ranked by the FDR value. Top-10 most significant are displayed. Up-regulated genes in *Nfic*<sup>-/-</sup> pancreata belong to several inflammatory gene sets. (B) RT-qPCR of inflammatory transcripts in total pancreas (left panel) or freshly isolated acinar cells (right panel) from wild-type and *Nfic*<sup>-/-</sup> mice ( $n \geq 4$  mice/genotype) (*S100a8*,  $P=0.73$ ; *S100a9*,  $P=0.028$ ; *Cxcl13*,  $P=0.067$ ; *C1qb*,  $P=0.007$ ; *C3*,  $P=0.13$ ; *Cfb*,  $P=0.015$ ; *Cfd*  $P=0.025$ ). (C) Heatmap showing the expression of transcripts coding for inflammatory genes in WT and *Nfic*<sup>-/-</sup> pancreata (RNA-Seq data). (D) Lentiviral *Nfic* knockdown in 266-6 cells results in up-regulation of ADM-related and inflammatory genes ( $n=4$  replicates/group). Two-sided Mann-Whitney U test.  $P < 0.1$  (#),  $P < 0.05$  (\*),  $P < 0.01$  (\*\*). Barplots are presented as mean values  $\pm$  SD. Source data are provided as a source data file.

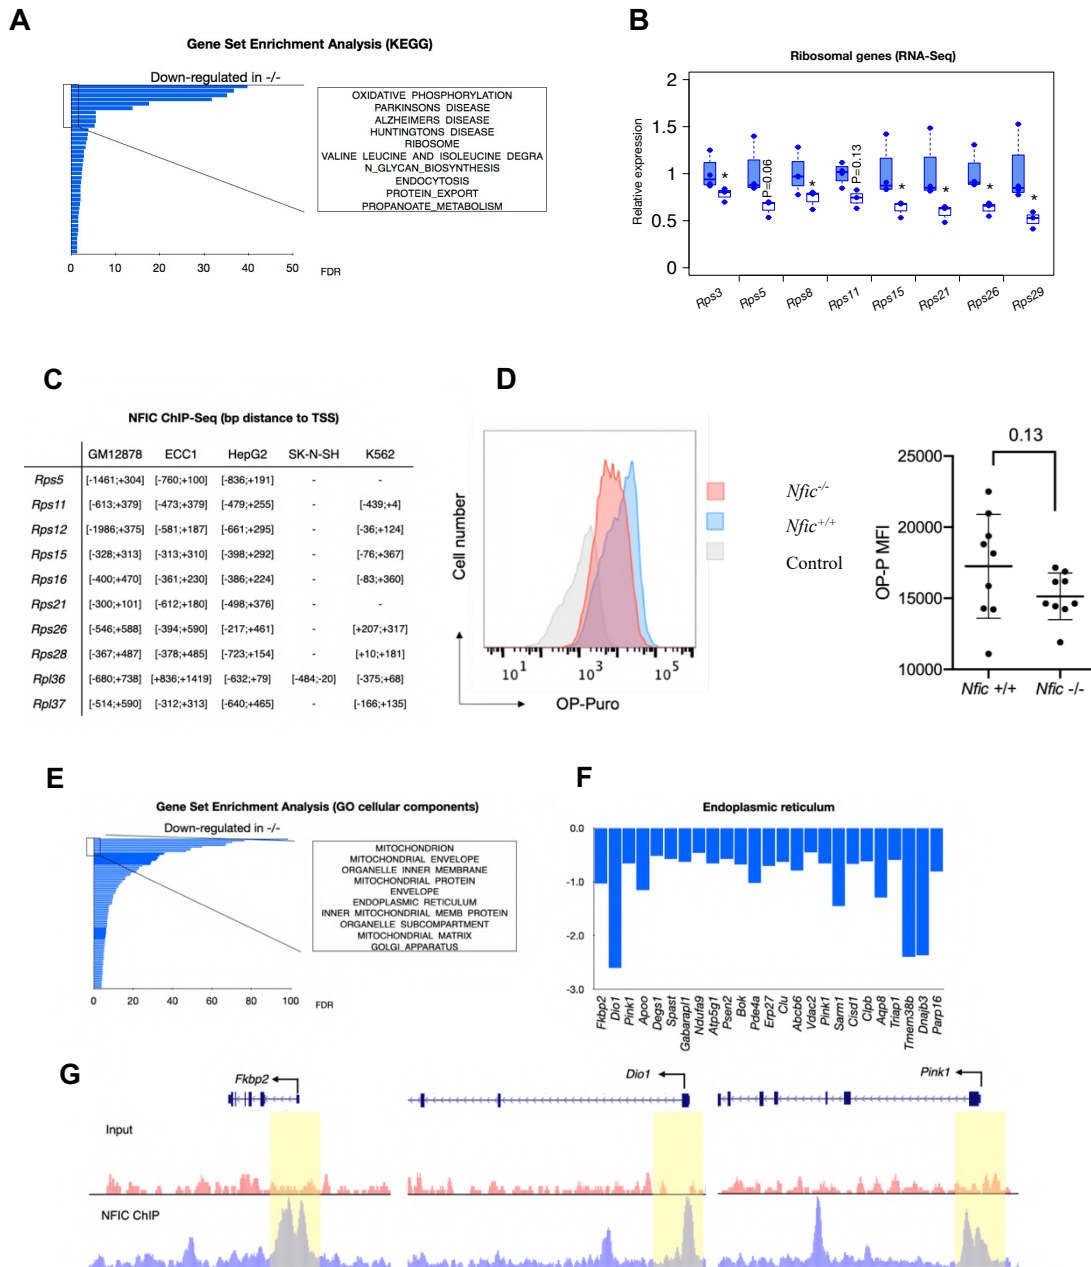

**Supplementary Figure 8. NFIC is involved in mRNA and protein metabolism.** (A) GSEA of differentially down-regulated genes in *Nfic*<sup>-/-</sup> pancreata using KEGG. Significant gene sets were ranked by the FDR value and top-10 most significant gene sets are displayed. When multiple gene sets display a similar FDR, a representative gene set is shown ( $n \geq 3$  mice/genotype). Down-regulated genes in *Nfic*<sup>-/-</sup> pancreata belong to mRNA, protein metabolism, oxidative phosphorylation, and protein export. (B) Expression analysis by RNA-Seq of ribosomal gene transcripts showing down-regulation in *Nfic*<sup>-/-</sup> pancreata. Expression values were normalized to those in WT pancreata ( $n \geq 3$  mice/genotype) (*Rps3*,  $P = 0.03$ ; *Rps5*,  $P = 0.06$ ; *Rps8*,  $P = 0.02$ ; *Rps11*,  $P = 0.13$ ; *Rps15*,  $P = 0.04$ ; *Rps21*,  $P = 0.04$ ; *Rps26*,  $P = 0.04$ ; *Rps29*,  $P = 0.023$ ; two-tailed Mann-Whitney U-test). (C) NFIC binding to the promoter of genes coding for ribosomal proteins in GM12878, ECC1, HepG2, SK-N-SH, and K562 cells. Data corresponds to distance to the transcription start site (TSS). (D) Fluorescence-based analysis of protein synthesis in freshly isolated pancreatic acini using the Click-It reaction protocol ( $n = 9$  mice/genotype). A representative plot corresponding to one WT and one *Nfic*<sup>-/-</sup> is shown. (E) GSEA of differentially down-regulated genes in *Nfic*<sup>-/-</sup> pancreata using GO cellular components showing enrichment in mitochondrion, ER, and Golgi complex. (F) Expression analysis by RNA-Seq of genes coding for ER components showing down-regulation in *Nfic*<sup>-/-</sup> pancreata ( $FDR < 0.05$ ) ( $n \geq 3$  mice/genotype). (G) Composites of NFIC ChIP-Seq showing a peak at the promoter of *Fkbp2*, *Dio1*, and *Pink1* as representative ER genes. Boxplots are displayed showing the minimum, the maximum, the sample median, and the first and third quartiles. Source data are provided as a source data file.



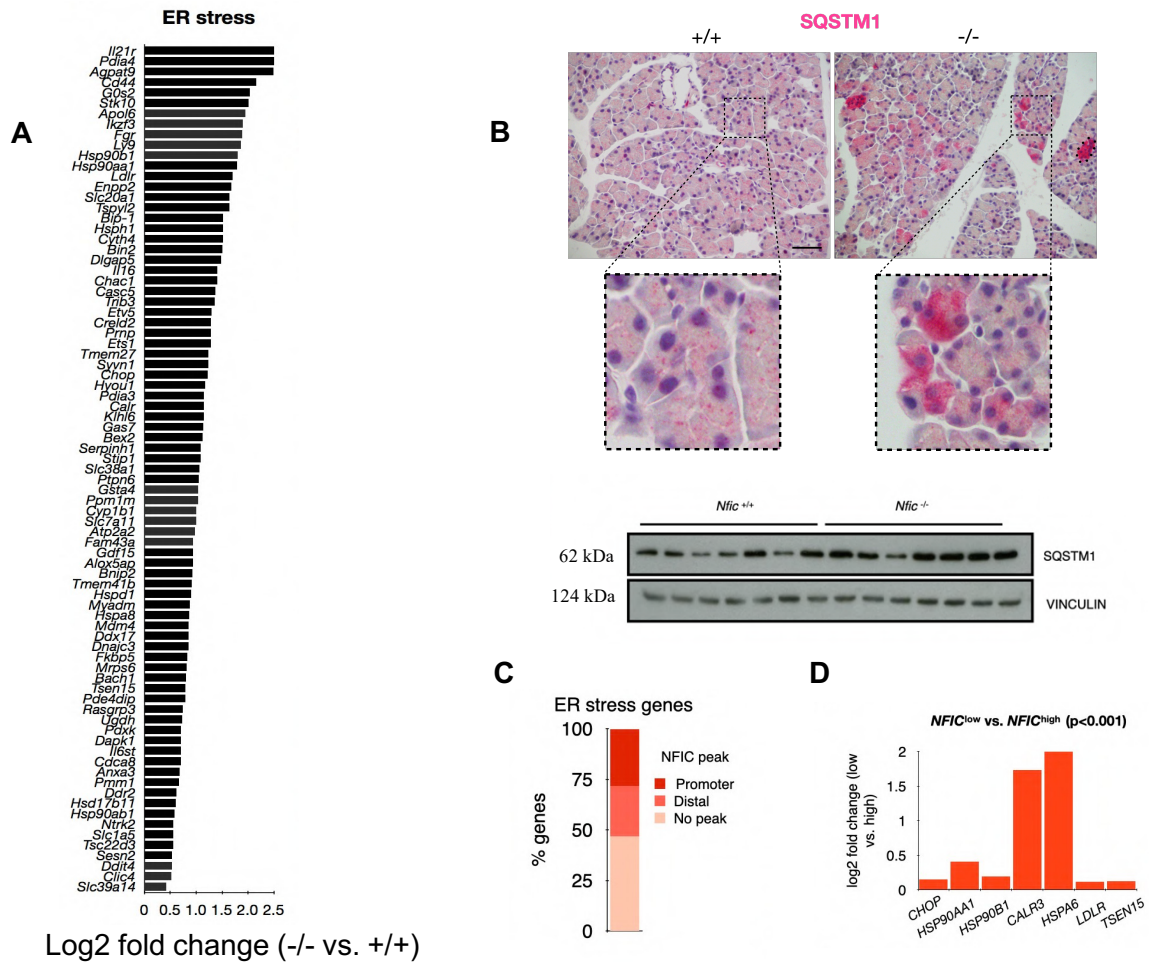

**Supplementary Figure 9. NFIC regulates the ER stress response.** (A) Expression of genes involved in the UPR and ER stress showing an up-regulation in *Nfic*<sup>-/-</sup> pancreata (RNA-Seq). (B) Up-regulation of the autophagy marker p62/SQSTM1 in *Nfic*<sup>-/-</sup> pancreata. IHC shows overexpression in a subset of acinar cells (one representative image from 2 replicates); confirmation by western blotting in the lower panel (n=7 mice/group). (C) Bar graph showing the percentage of ER stress genes with an NFIC peak at the promoter or at distal regions. (D) Expression analysis showing up-regulation of ER stress genes in *NFIC*<sup>low</sup> compared to *NFIC*<sup>high</sup> human pancreata (GTEx dataset) (*CHOP*, P=1.7e-5; *HSP90AA1*, P=2.5 e-7; *HSP90B1*, P=1.1 e-5; *CALR3*, P=3.1 e-11; *HSPA6*, P=5.4 e-10; *LDLR*, P=6.1 e-5; *TSEN15*, P= 1.9 e-5; an integration of Fisher's exact test and likelihood ratio were used to calculate statistical significance). Source data are provided as a source data file.

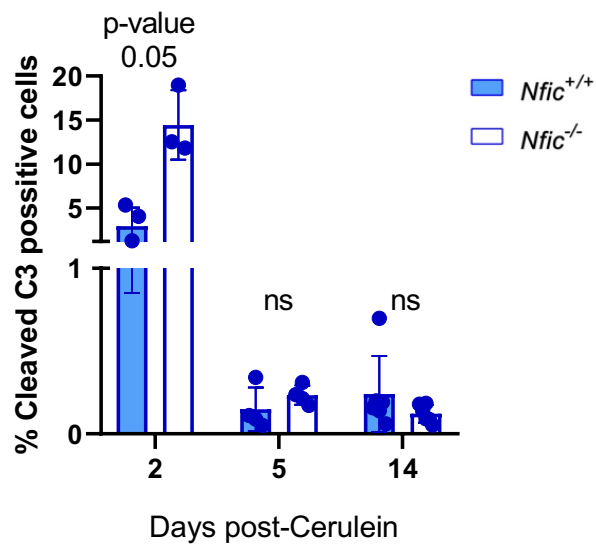

**Supplementary Figure 10. Increased cleaved caspase 3 expression 48h post cerulein administration in *Nfic*<sup>-/-</sup> mice.** IHC analysis of cleaved caspase 3 in wild-type and *Nfic*<sup>-/-</sup> pancreata 48h, 5 days, and 14 days after the induction of pancreatitis showing increased damage in mutant mice (n  $\geq$  3 mice/genotype). Two-sided Mann-Whitney U test was used to calculate statistical significance. Barplots are presented as mean values +/- SD. Source data are provided as a source data file.

## **SUPPLEMENTARY TABLES**

**Supplementary Table 1. List of antibodies used.**

**Supplementary Table 2. List of primers used for RT-qPCR.**

**Supplementary Table 3. List of primers used for ChIP-qPCR.**

**Supplementary Data 1. NR5A2 interactors in normal mouse pancreas tissue identified through IP-MS. Data provided as an Excel file. (One-tailed T-test with a permutation-based FDR control)**

**Supplementary Data 2. Differentially expressed genes in *Nfic*<sup>-/-</sup> vs. WT mouse pancreata. Data provided as an Excel file. (Two-tailed Mann-Whitney U-test)**

**Supplementary Table 1. List of antibodies used.**

| <b>Protein</b>                 | <b>Catalog reference</b>                 | <b>Working concentration and(technique)</b>                                |
|--------------------------------|------------------------------------------|----------------------------------------------------------------------------|
| ACTIN                          | Sigma-Aldrich, MA1-744                   | 0.02 µg/mL (WB)                                                            |
| BIP-1(HSPA5)                   | Cell Signalling, C50B12                  | 0.8 µg/mL (IF); 0.2 µg/mL (WB)                                             |
| Long ribosomal RNAs            | Thermofisher MA1-13017                   | 2 µg/mL (IF)                                                               |
| CD45                           | Novus Biologicals, NB110-93609           | 0.8 µg/mL (IHC)                                                            |
| CDH1                           | BD transduction, C20 820                 | 0.25-0.35 µg/mL (IHC, IF)                                                  |
| CEL                            | Abcam, ab87431                           | 0.2 µg/mL (WB)                                                             |
| CHOP (DDIT3)                   | Cell Signalling, CL63F7                  | 0.2 µg/mL (WB)                                                             |
| Cleaved Caspase-3 (Asp175)     | Cell Signalling 9661                     | 1:400 (IHC)                                                                |
| CPA1                           | RnD Systems, AF2765                      | 1 µg/mL (IF)                                                               |
| CPA1                           | Biorad (formerly AbD serotec), 1810-0006 | 0.5 µg/mL (WB)                                                             |
| CTRB1                          | Biorad (formerly AbD serotec), 2100-0657 | 0.5 µg/mL (WB)                                                             |
| ERK                            | Cell Signalling, CST #9102               | 0.1 µg/mL (WB)                                                             |
| HA- tag                        | Sigma -Aldrich, F3165                    | 0.1 µg/mL (WB)                                                             |
| Histone H3                     | Abcam, ab1791                            | 0.05 µg/mL (WB)                                                            |
| IgG (Goat)                     | Millipore, NI02                          |                                                                            |
| IgG (Mouse)                    | Santa Cruz, sc-2025                      |                                                                            |
| IgG (Rabbit)                   | Millipore, 12-370                        |                                                                            |
| INS1                           | Dako, A0564                              | 1/400 (IF)                                                                 |
| KI67                           | Leica, clone MM1, K2                     | 0.05 µg/mL (IHC)                                                           |
| KI67                           | Bethyl, IHC-00375                        | 0.05 µg/mL (IHC)                                                           |
| KRT19 (Troma3)                 | Monoclonal Antibodies Unit (CNIO)        | 1/25 (IF); 1/50 (IHC)                                                      |
| NFIC                           | Bethyl, A303-123A                        | 0.4 µg/mL (IHC on formalin-fixed sections)                                 |
| NFIC                           | Abcam, ab89516                           | 1.25 µg/mL (IHC/IF on PFA-fixed sections); 0.5 µg/mL (WB); 1 µg/ChIP or IP |
| NFIC                           | Abcam, ab245597                          | 1µg/mL (WB)                                                                |
| NR5A2                          | Everest, EB12283                         | 2 µg/ChIP or IP; 0.5 µg/mL (WB)                                            |
| P-EIF4E (Ser <sup>209</sup> )  | Cell Signalling, CST #9741               | 0.2 µg/mL (WB)                                                             |
| P-S6 (Ser <sup>240/244</sup> ) | Cell Signalling, CST #2215               | 1 µg/mL (IHC)(IF); 0.2 µg/mL (WB)                                          |
| P-S6K1(Thr <sup>389</sup> )    | Cell Signalling, CST #9205               | 0.2 µg/mL (WB)                                                             |
| PTF1A                          | Kindly provided by B. Bréant (INSERM)    | 1/400 (IHC); 1/200 (IF); 1/1000 (WB); 1/500 (ChIP)                         |
| SOX9                           | Millipore AB535                          | 0.4 µg/mL (IF)                                                             |
| VINCULIN                       | Sigma -Aldrich, Clone hVIN-1             | 0.1-0.13 µg/mL (WB)                                                        |

**Supplementary Table 2. List of primers used for RT-qPCR.**

| <b>Gene</b>                          | <b>Forward</b>                | <b>Reverse</b>                 |
|--------------------------------------|-------------------------------|--------------------------------|
| <i>Amy2a5</i>                        | TGGCGTCAAATCAGGAACATG         | AAAGTGGCTGACAAAGCCCAG          |
| <i>Bip1/Hspa5</i>                    | TCATCGGACGCACTTGGAA           | CAACCACCTTGAATGGCAAGA          |
| <i>Cel</i>                           | AAGTTGCCCGTGAAAAAGCAG         | ATGGTAGCAAATAGGTGGCCG          |
| <i>Cela1</i>                         | TGTGTCACACCCCTACTGGA          | TTGTTAGCCAGGATGGTTCC           |
| <i>Cela2a</i>                        | AGGTGGAGGATGATGTGAGC          | TGTCAGAACCCAGTTGTTGG           |
| <i>Cela3b</i>                        | AGTTGTCAATGGCGAGGAAG          | CAGAACCCAGTCAGGGGTAA           |
| <i>C1qb</i>                          | CACAGAACACCAGGATCCA           | CCCACTGTGTCTTCATCAGC           |
| <i>Ccl5</i>                          | GCCTCACCATATGGCTCGGACA        | CCTTGACGTGGGCACGAGGC           |
| <i>Ccl5</i>                          | GTGCCACGTCAAGGAGTAT           | CCCACTTCTTCTCTGGGTTG           |
| <i>Ccl7</i>                          | CCAACCAGATGGGCCCAATGC<br>ATCC | TCAGCGCAGACTTCCATGCCC          |
| <i>Ccl9</i>                          | TGGGCCCAGATCACACATGCAA<br>C   | CGGCCTGGTACACCCACCAC           |
| <i>Complement C3<br/>(C3)</i>        | AGTGCTACTGCTGCTGTTGG          | GCCGTAGGACATTGGGAGTA           |
| <i>Complement<br/>Factor B (CFB)</i> | CCGAGACCAAAGATTGTCC           | TCCCCATTTTCAAAGTCCTG           |
| <i>Complement<br/>Factor D (CFD)</i> | TGCACAGCTCCGTGTACTTC          | CTCCTGGCCACCCAGAAT             |
| <i>Complement<br/>Factor P (CFP)</i> | TATGCCTTCCAGGAGCATGA          | CCATAAGGACCATGCTGACC           |
| <i>Chop/Ddit3</i>                    | GTCCCTAGCTTGGCTGACAGA         | TGGAGAGCGAGGGCTTTG             |
| <i>Cpa1</i>                          | TACACCCACAAAACGAATCGC         | GCCACGGTAAGTTTCTGAGCA          |
| <i>Ctrb1</i>                         | GCAAGACCAAATACAATGCC          | TGCGCAGATCATCACATCG            |
| <i>Cxcl13</i>                        | GCCTCTCTCCAGGCCACGGTAT        | AGCCATTCCCAGGGGGCGTA           |
| <i>Hprt</i>                          | CGTCGTGATTAGCGATGATGA         | ACAATGTGATGGCCTCCA             |
| <i>Hsd17b11</i>                      | CTGACTGCCTACGAATTTGCC         | GTTTCTCTCGATGCCGTTCTTATT       |
| <i>Nfic</i>                          | TGGACCTGTACCTGGCCTAC          | GCTCTCCTGGAAGTCTGTGG           |
| <i>Nr5a2</i>                         | CGATCAGCGGGAGTTTGTAT          | CATTCACCTGCTCTTGGACA           |
| <i>Nr5a2</i>                         | GTTGAGTGGGCCAGGAGTAGTA        | ACGCGACTTCTGTGTGTGAG           |
| <i>Nr5a2</i>                         | TTGAGTGGGCCAGGAGTAGTA         | ACGCGACTTCTGTGTGTGAG           |
| <i>Nr5a2</i>                         | TCATGCTGCCCAAAGTGGAGA         | TGGTTTTGGACAGTTCGCTT           |
| <i>Pnlp</i>                          | ACAGATCAACACCCGCTTTC          | CGGGTTTTTCTGTTTGTTCG           |
| <i>Ptf1a</i>                         | AACCAGGCCCAGAAGGTTAT          | AAAGAGAGTGCCCTGCAAGA           |
| <i>Rnase1</i>                        | CAGCAGGACAAACAATGGAA          | CCAATTCGTCTTGGAGTTCA           |
| <i>Spink3</i>                        | GGCAACTAGCCTCTTTTCCA          | GACAATGAAGGTGGCTGTCA           |
| <i>Nr0b2</i>                         | AGCTGGGTCCCAAGGAGTAT          | AGTGAGCCTCCTGTTGCAG            |
| <i>Rps5</i>                          | CAAGCTCTTTGGGAAATGGA          | GGGCAGGTACTIONGGCATACT         |
| <i>Rps8</i>                          | TTAGAAACCGGACCGTGAAG          | TCTCAGGGCACGGTACTTCT           |
| <i>Rps28</i>                         | CTCCTCTCCGCCAGATCG            | GCCTTTGACATTTCCGATGA           |
| <i>S100a10</i>                       | TCTTCGGCACTAGCCTCATC          | ATTTGGGATGGCATTITGAA           |
| <i>S100a11</i>                       | CAAAAGTACAGCGGGAAGGA          | CTTCTTCATCATGCGGTCAA           |
| <i>Spliced Xbp1<br/>45S</i>          | AAGAACACGCTTGGGAATGG          | CTGCACCTGCTGCGGAC              |
| <i>Mature 18S</i>                    | GAGCTGGTGGTGGCGCTCC           | CTTGCCCTCCTTCTCT               |
| <i>Mature 5.8S</i>                   | GATGGTAGTCGCCGTGCC            | GCCTGCTGCCTTCCTTGG             |
| <i>Mature 28S</i>                    | ACTCGGCTCGTGCGTC              | CCGACGCTCAGACAGG               |
| <i>5.8S 5'<br/>Junction</i>          | GACGCGCATGAATGGA              | TGTGGTTTTCGCTGGATAGTAGGT       |
| <i>28S 5'<br/>Junction</i>           | TACGACTCTTAGCGGTGGATCA        | TCACATTAATTCTCGCAGCTAGCT       |
|                                      | CTGACCGCGACCTCAGAT            | TCCGCTGACTAATATGCTTAAATTC<br>A |

**Supplementary Table 3. List of primers used for CHIP-qPCR.**

| <b>Gene<br/>(promoter)</b> | <b>Forward</b>                  | <b>Reverse</b>               |
|----------------------------|---------------------------------|------------------------------|
| <i>Cel</i>                 | CCATAAATACTGGAGAAGAGGAG<br>AGAA | CAGGCGCCCCATGGT              |
| <i>Cela2a</i>              | GGCACTCTTCTCAGGGTGT             | GAGCATGTGTGTCCTTCCATT        |
| <i>Cela2a</i>              | GGACCTGTCTTTGGCATGTT            | TTTCCATTCCCTTGTCGTTT         |
| <i>Cpa1</i>                | CATGGTCAAGGGTGAAAGC             | GAGGCAGGAGTTCCAAACTG         |
| <i>Cpa1</i>                | AGCTGACCCCATGGTCAAGGG           | GGGTCCCTGGGGACAGTTCC<br>C    |
| <i>Ctrb1</i>               | CCAACCAGAAAGGTCCAAGA            | CAGAGCAGCTGTCCTTTTCC         |
| <i>Chop/Ddit3</i>          | CCTCCCACCACCATCGAC              | GAGGAGGTGAGTGAGTCATGC        |
| <i>Hspa5/Bip-1</i>         | TGTTTCTCCTTCACCCCAAG            | GCGGAGAAAGGGAATAGGTT         |
| <i>Hsp90aa1</i>            | TACGCAACCAGAACCCCAAGT           | AGGCAAAGGTCCCCCTTC           |
| <i>Negative region</i>     | TTGGGTGTTGGGAACTGAAT            | CCCTTCTCTGCCTTCTGATG         |
| <i>Nfic promoter #1</i>    | AGGCTGCTAGCGCTGTTCTA            | CACTGCCAAAGATGGAGGAG         |
| <i>Nfic promoter #2</i>    | CACCTGGCTGTCATGTGTC             | CAATTGCATGTCAGGCTTGT         |
| <i>Nfic promoter #3</i>    | GGAGGAGGGGAGTGAGAGTT            | ACACGACTCCTGCCTGTCTC         |
| <i>Nr0b2</i>               | GACAAGCTGACAGTCACACACTA<br>GAA  | GCCCTGGCACCTGGTTTA           |
| <i>Pnlip</i>               | CCGGTACTTCTCTGGGCTTA            | CTACGGACAACGAGCAAACA         |
| <i>Pnlip</i>               | CGCTCAGCCTCCGGTACTT             | GGCTCCAAGGACGTACTTCTA<br>ATT |
| <i>Rps5</i>                | TTAAGGGTGCTGATTGTAACGA          | AGTATTTTGAGACAAAGTCCGA<br>TT |
| <i>Rps8</i>                | CTGTGAACAGAGCGTTGGAG            | AGGCCAACCTGGTCTACAAA         |
| <i>Rps28</i>               | GGGAAGGATTTGGGTTCTGT            | GGAGCTAAAGCCAGGCAATC         |

Source data of Supplementary blots

Supplementary Figure 1A

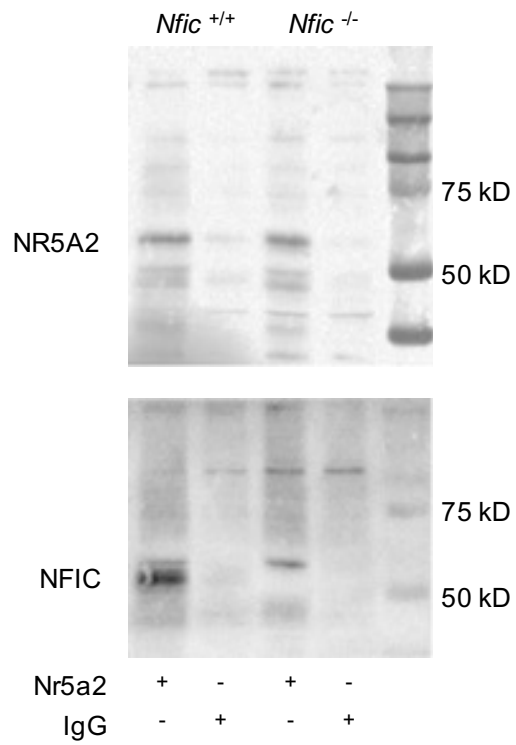

Supplementary Figure 9B

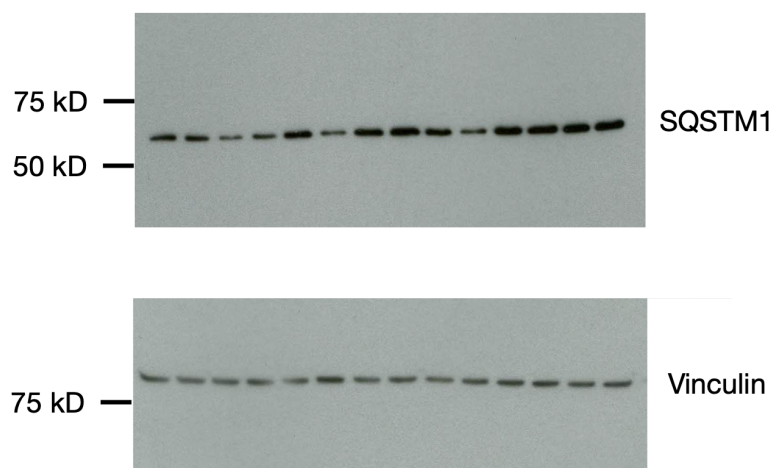

Supplement: 41467_2023_39291_MOESM1_ESM.pdf [file 41467_2023_39291_MOESM1_ESM.pdf]
