# Supplementary material for: NFIC regulates ribosomal biology and ER stress in pancreatic acinar cells and restrains PDAC initiation
Source: PubMed Central journal article supplement (PMC10290102; doi:10.1038/s41467-023-39291-x), 2023-06-23
Supplement: 41467_2023_39291_MOESM3_ESM.pdf [file 41467_2023_39291_MOESM3_ESM.pdf]

## Description of Additional Supplementary Files

File Name: Supplementary Data 1

Description: **NR5A2 interactors in normal mouse pancreas tissue identified through IP-MS. Data provided as an Excel file.** (One-tailed T-test with a permutation-based FDR control)

File Name: Supplementary Data 2

Description: **Differentially expressed genes in Nfic<sup>-/-</sup> vs. WT mouse pancreata. Data provided as an Excel file.** (Two-tailed Mann-Whitney U-test)
